# Supplementary material
Source: Springer Nature journal article supplement (https://www.springermedizin.de/resource/supplementary/12885_2007_1017_MOESM3_ESM.pdf/9471922)

**Fig 3**

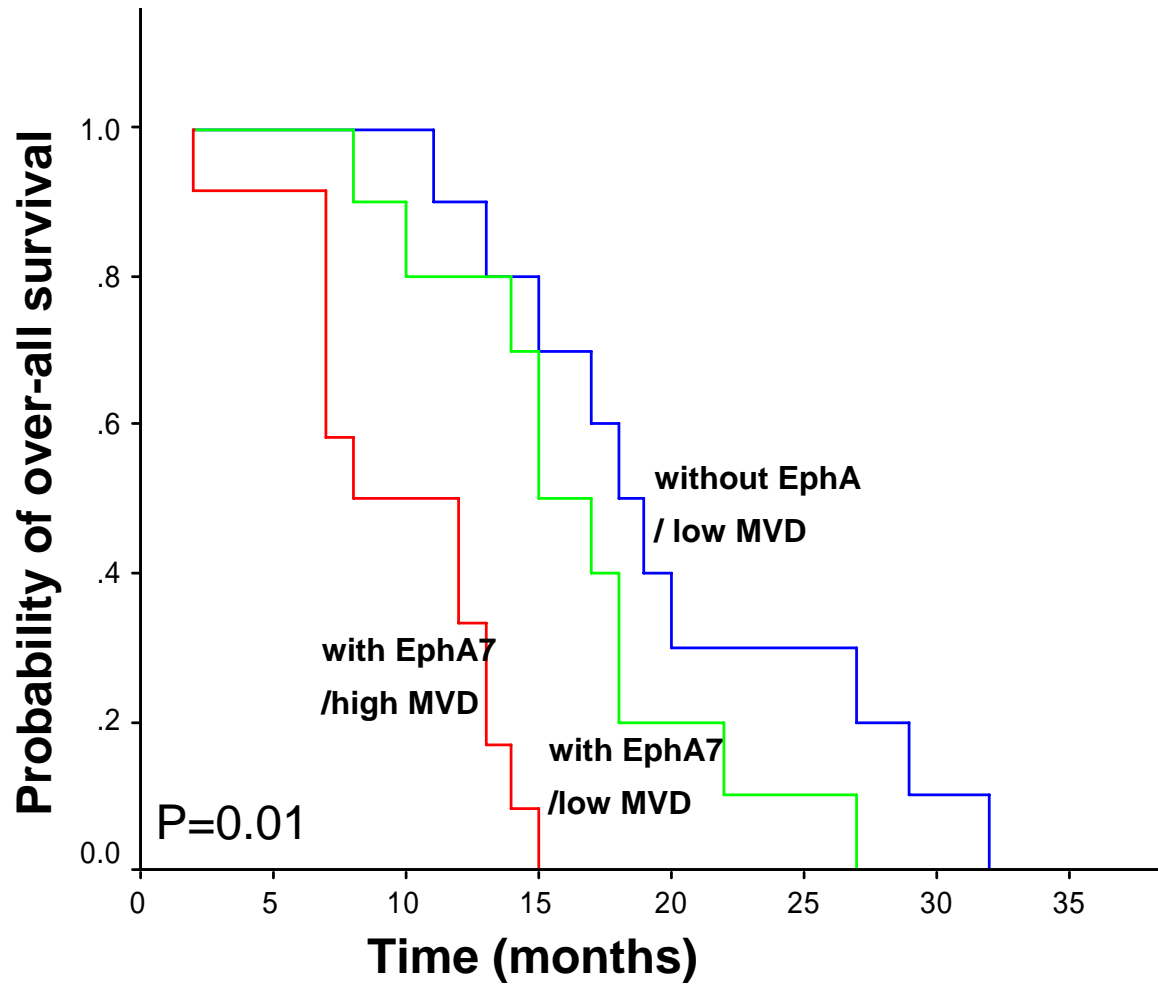

Supplement: MOESM3 [file 9471922]
